# Supplementary material
Source: PubMed Central journal article supplement (PMC357059)
Supplement: pnas_0308573100_7.pdf [file pnas_0308573100_7.pdf]

J166<sub>output</sub> babB AAAATTACAAAAAAAAAAAAAAAAA...CGCTTTATGCTATAATACTCCAATACATTCTAATAGCAAATGCATT

J166<sub>input</sub> babB AAAATTACAAAAAAAAAAAAAAAAA...CGCTTTATGCTATAATACTCCAATACATTCTAATAGCAAATGCATT

J166<sub>output</sub> babB2 AAAATTACAAAAAAAAAAAAAAAAA...CGCTTTATGCTATAATACTCCAATACATTCTAATAGCAAATGCATT

J166<sub>input</sub> babB2 AAAATGACAAAAAAAAAAAAAAAAA...CGCTTTATGCTATAATACTCCAATACATTCTAATAGCAAATGCATT

J166<sub>input</sub> babA AAAATGACAAAAAAAAAAAAAAAAA...CGCTTTATGCTATAATACTCCAATACATTCCAAT.GCAAATGCATT

J166<sub>output</sub> babB CTAATGCAAATGTATAATGAATGTATGAAATCCCTAATACTAATCCAATTTAATCCAAAAAGGAGAAAACATG

J166<sub>input</sub> babB CTAATGCAAATGTATAATGAATGTATGAAATCCCTAATACTAATCCAATTTAATCCAAAAAGGAGAAAACATG

J166<sub>output</sub> babB2 CTAATGCAAATGTATAATGAATGTATGAAATCCCTAATACTAATCCAATTTAATCCAAAAAGGAGAAAACATG

J166<sub>input</sub> babB2 CTAATGCAAATGTATAATGAATGTATGAAATCCCTAATACTAATCCAATTTAATCCAAAAAGGAGAAAACATG

J166<sub>input</sub> babA CTAATGCAAATGTGT.TCCAATGTATGAAATCCCTAATACTAATCCAATTTAATCCAAAAAGGAGAAAACATG
