# Supplementary material
Source: PubMed Central journal article supplement (PMC357059)

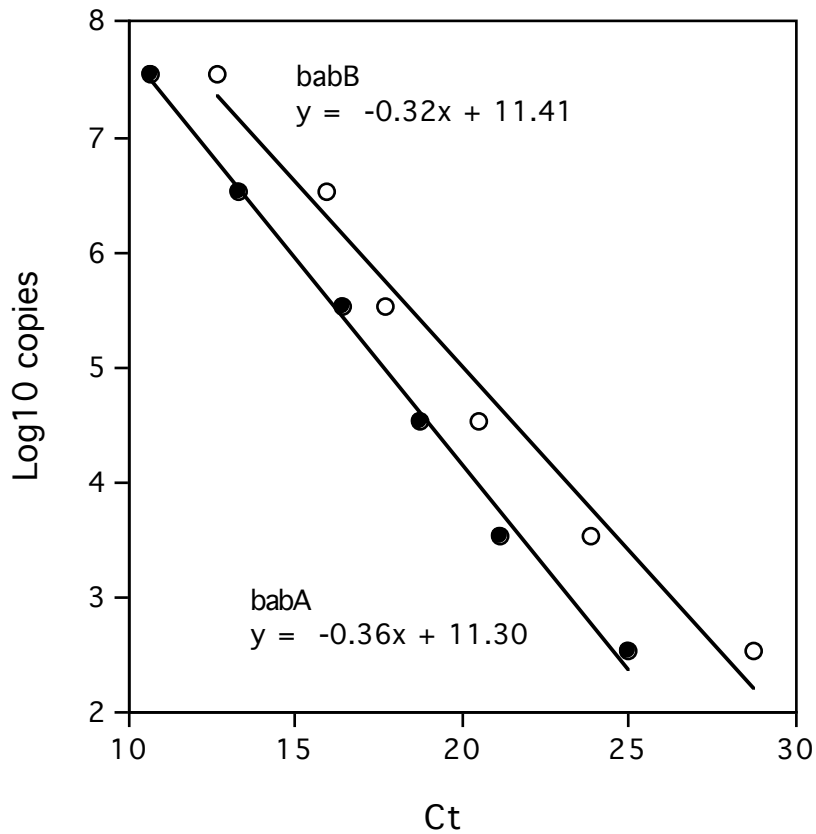

Supplement: pnas_0308573100_11.pdf [file pnas_0308573100_11.pdf]

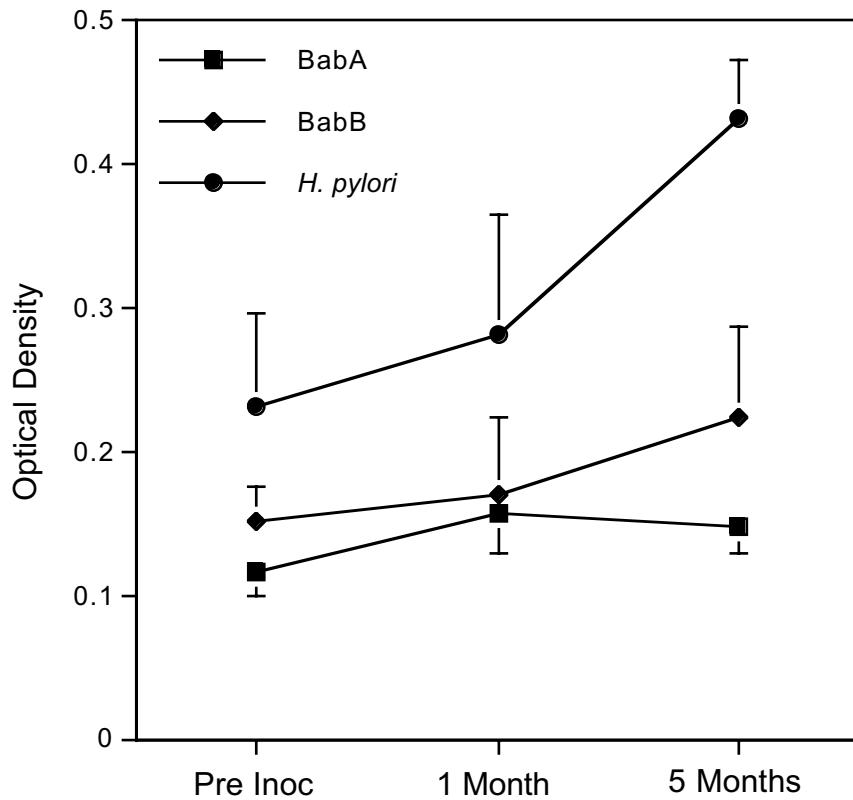

Supplement: pnas_0308573100_13.pdf [file pnas_0308573100_13.pdf]

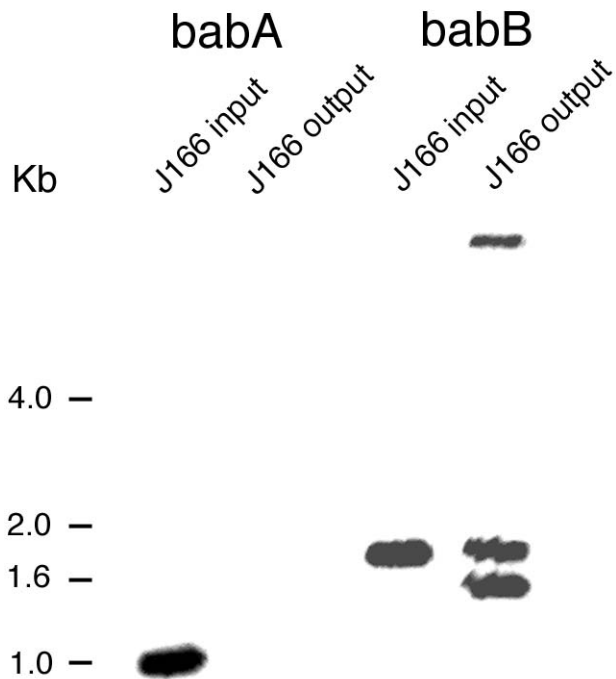

Supplement: pnas_0308573100_3.pdf [file pnas_0308573100_3.pdf]

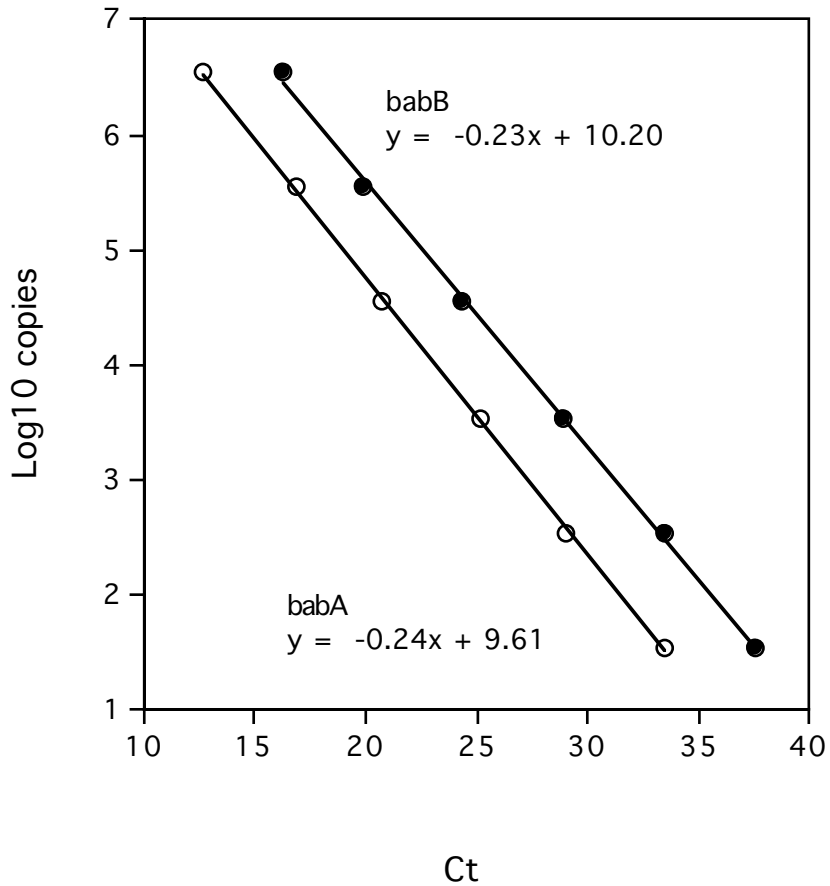

Supplement: pnas_0308573100_5.pdf [file pnas_0308573100_5.pdf]

J99

1

2

3

4

5

6

7

8

9

10

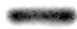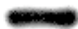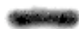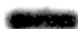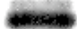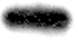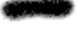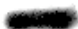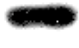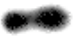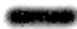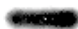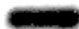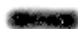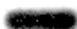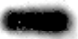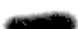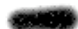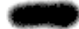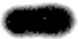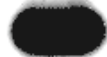

Supplement: pnas_0308573100_9.pdf [file pnas_0308573100_9.pdf]
